# Supplementary material for: Low Valine Serum Levels Predict Increased 1-Year Mortality in Acute Heart Failure Patients
Source: MDPI journal article supplement (doi:10.3390/biom13091323), 2023-08-29
Supplement: s1 [file s1]

**Table S5.** Cox regression analyses of valine as predictor of 1-year mortality in AHF patients.

|            | HR (95% CI) per 1-SD | p-value      | Event/N |
|------------|----------------------|--------------|---------|
| Base model | 0.73 (0.59-0.90)     | <b>0.003</b> | 112/303 |
| Model 1    | 0.73 (0.59-0.89)     | <b>0.002</b> | 112/303 |
| Model 2    | 0.73 (0.60-0.90)     | <b>0.003</b> | 112/303 |
| Model 3    | 0.74 (0.60-0.91)     | <b>0.004</b> | 112/303 |
| Model 4    | 0.73 (0.59-0.89)     | <b>0.002</b> | 112/303 |
| Model 5    | 0.74 (0.61-0.90)     | <b>0.003</b> | 117/314 |
| Model 6    | 0.75 (0.61-0.91)     | <b>0.003</b> | 117/314 |

Valine ( $\mu\text{mol/L}$ ) was log-transformed before Cox regression analysis.

Base model: Adjusted for age, sex, BMI, MAP, eGFR, BUN, CRP, NT-proBNP, hemoglobin, ALT, albumin, and total cholesterol.

Model 1: Base model with LDL-cholesterol instead of total cholesterol.

Model 2: Base model with signs\* of venous volume overload instead of total cholesterol.

Model 3: Base model with previous  $\beta$ -blocker use instead of total cholesterol.

Model 4: Base model with previous ACEI use instead of total cholesterol.

Model 5: Base model without albumin.

Model 6: Base model with signs\* of venous volume overload instead of albumin.

\*Signs include any of the following: peripheral edema, enlarged liver, ascites, or jugular venous distension.

P-values of  $< 0.05$  were considered significant and are depicted in bold.

ACEI: angiotensin-converting-enzyme inhibitor; ALT, alanine aminotransferase; BMI, body mass index; BUN, blood urea nitrogen; CRP, C-reactive protein; eGFR, estimated glomerular filtration rate; HR, hazard ratio; MAP, mean arterial pressure; N, number of observations; NT-proBNP, N-terminal pro-brain natriuretic peptide.
