# Supplementary material for: Low Valine Serum Levels Predict Increased 1-Year Mortality in Acute Heart Failure Patients
Source: MDPI journal article supplement (doi:10.3390/biom13091323), 2023-08-29
Supplement: s1 [file s1]

**Table S3.** Serum levels (concentrations) of metabolites quantified by NMR spectroscopy which were significantly different in patients who were alive compared to those who died within 1 year after hospitalization for AHF.

| Metabolite ( $\mu\text{mol/L}$ ) | Alive<br>(N=197)     | Deceased<br>(N=118)  | All<br>(N=315)       | p-value           |
|----------------------------------|----------------------|----------------------|----------------------|-------------------|
| Valine                           | 292.2 (252.9, 325.7) | 257.0 (209.5, 295.1) | 279.2 (234.9, 318.8) | <b>&lt; 0.001</b> |
| Glutamic acid                    | 473.1 (436.3, 527.2) | 433.2 (396.9, 466.6) | 457.8 (422.8, 508.6) | <b>&lt; 0.001</b> |
| Ketoleucine                      | 39.7 (34.7, 48.9)    | 35.7 (30.0, 43.0)    | 38.4 (33.4, 47.3)    | <b>&lt; 0.001</b> |
| Aspartic acid                    | 123.7 (109.9, 137.9) | 133.7 (117.8, 150.3) | 128.3 (113.4, 144.2) | <b>&lt; 0.001</b> |
| Trimethylamine N-oxide           | 17.4 (15.3, 20.5)    | 16.0 (13.7, 17.9)    | 16.7 (14.8, 19.5)    | <b>&lt; 0.001</b> |
| Creatine                         | 142.3 (123.8, 167.3) | 158.6 (140.6, 195.2) | 150.5 (131.4, 178.9) | <b>&lt; 0.001</b> |
| Phosphorylcholine                | 40.1 (32.9, 48.6)    | 32.9 (28.4, 38.7)    | 37.3 (30.5, 45.4)    | <b>&lt; 0.001</b> |
| Tryptophan                       | 60.6 (51.0, 72.8)    | 52.6 (43.7, 62.5)    | 57.8 (46.3, 70.1)    | <b>&lt; 0.001</b> |

Data are presented as median and interquartile range (q1, q3). Differences between AHF patients who were alive and those who deceased within 1 year after hospitalization for AHF were tested using the Mann-Whitney U test.

P-values of < 0.001 were considered significant after a Bonferroni correction for multiple testing and are depicted in bold.
