# Supplementary material for: Low Valine Serum Levels Predict Increased 1-Year Mortality in Acute Heart Failure Patients
Source: MDPI journal article supplement (doi:10.3390/biom13091323), 2023-08-29
Supplement: s1 [file s1]

**Table S2.** Integrals of NMR signals (arbitrary units) in patients who were alive compared to those who died within 1 year after hospitalization for AHF.

| Metabolite (AU)                | Alive<br>(N=197)     | Deceased<br>(N=118)  | All<br>(N=315)       | p-value           |
|--------------------------------|----------------------|----------------------|----------------------|-------------------|
| 2-Hydroxy-3-methylbutyric acid | 5.5 (4.7, 6.7)       | 5.7 (4.6, 6.8)       | 5.6 (4.7, 6.7)       | 0.792             |
| Leucine                        | 21.2 (18.7, 24.2)    | 20.5 (17.5, 23.7)    | 21.1 (18.1, 24.1)    | 0.138             |
| Isoleucine                     | 8.7 (7.3, 10.3)      | 7.9 (6.5, 9.5)       | 8.4 (7.1, 9.8)       | 0.008             |
| Valine                         | 27.6 (23.9, 30.8)    | 24.3 (19.8, 27.9)    | 26.4 (22.2, 30.1)    | <b>&lt; 0.001</b> |
| Isobutyric acid                | 3.3 (2.7, 3.9)       | 3.2 (2.7, 4.1)       | 3.3 (2.7, 4.0)       | 0.956             |
| 3-Methy2-oxovaleric acid       | 138.8 (95.8, 206.6)  | 150.3 (108.8, 221.9) | 143.8 (101.3, 217.8) | 0.394             |
| Ethanol                        | 4.2 (3.9, 4.6)       | 4.2 (3.8, 4.7)       | 4.2 (3.9, 4.6)       | 0.892             |
| 3-Hydroxybutyric acid          | 30.8 (13.4, 58.7)    | 35.1 (18.4, 64.5)    | 32.2 (15.1, 62.5)    | 0.244             |
| Lactic acid                    | 358.2 (290.9, 467.5) | 350.1 (277.0, 440.8) | 354.3 (287.2, 460.0) | 0.400             |
| Alanine                        | 42.9 (35.7, 52.2)    | 38.8 (30.9, 47.7)    | 41.2 (34.0, 49.9)    | 0.001             |
| Sebacic acid                   | 3.9 (3.5, 4.2)       | 3.9 (3.5, 4.4)       | 3.9 (3.5, 4.2)       | 0.126             |
| Arginine                       | 5.9 (5.4, 6.4)       | 5.7 (5.2, 6.2)       | 5.8 (5.4, 6.3)       | 0.035             |
| Acetic acid                    | 23.6 (15.6, 45.7)    | 19.0 (15.2, 38.9)    | 22.1 (15.5, 43.3)    | 0.077             |
| Acetone                        | 6.7 (5.4, 10.5)      | 7.2 (5.6, 10.6)      | 6.9 (5.5, 10.5)      | 0.188             |
| Glutamic acid                  | 26.8 (24.7, 29.9)    | 24.6 (22.5, 26.4)    | 25.9 (24.0, 28.8)    | <b>&lt; 0.001</b> |
| Succinic acid                  | 9.5 (7.6, 11.4)      | 9.5 (7.7, 11.5)      | 9.5 (7.6, 11.5)      | 0.995             |
| Glutamine                      | 43.6 (39.0, 48.9)    | 42.1 (36.7, 50.6)    | 43.1 (38.3, 49.5)    | 0.433             |
| Citric acid                    | 7.5 (6.2, 9.9)       | 7.4 (6.2, 9.5)       | 7.4 (6.2, 9.7)       | 0.925             |
| Ketoleucine                    | 2.5 (2.2, 3.1)       | 2.3 (1.9, 2.7)       | 2.4 (2.1, 3.0)       | <b>&lt; 0.001</b> |
| Methionine                     | 1.5 (1.4, 1.8)       | 1.6 (1.4, 1.9)       | 1.6 (1.4, 1.8)       | 0.033             |
| Aspartic acid                  | 1.9 (1.7, 2.2)       | 2.1 (1.9, 2.4)       | 2.0 (1.8, 2.3)       | <b>&lt; 0.001</b> |
| Dimethylamine                  | 2.1 (1.7, 4.2)       | 2.5 (1.9, 4.5)       | 2.2 (1.8, 4.3)       | 0.023             |
| Trimethylamine                 | 2.2 (2.0, 2.4)       | 2.3 (2.1, 2.5)       | 2.3 (2.1, 2.4)       | 0.012             |
| Lysine                         | 7.4 (6.6, 8.2)       | 7.3 (6.7, 8.4)       | 7.4 (6.6, 8.3)       | 0.397             |
| Creatine                       | 26.9 (23.4, 31.6)    | 30.0 (26.6, 36.9)    | 28.4 (24.8, 33.8)    | <b>&lt; 0.001</b> |
| Ornithine                      | 7.3 (6.5, 8.6)       | 7.5 (6.3, 8.6)       | 7.4 (6.3, 8.6)       | 0.894             |
| Choline                        | 14.9 (12.2, 16.8)    | 15.0 (12.6, 17.4)    | 14.9 (12.3, 17.0)    | 0.287             |
| Phosphorylcholine              | 22.7 (18.6, 27.5)    | 18.7 (16.1, 21.9)    | 21.2 (17.3, 25.8)    | <b>&lt; 0.001</b> |
| Glycerophosphocholine          | 61.9 (53.6, 71.5)    | 59.9 (51.8, 69.3)    | 61.1 (53.0, 71.2)    | 0.390             |
| Carnitine                      | 54.9 (45.3, 63.6)    | 54.9 (44.9, 61.8)    | 54.9 (45.2, 62.8)    | 0.768             |
| Trimethylamine N-oxide         | 9.8 (8.7, 11.6)      | 9.1 (7.8, 10.2)      | 9.5 (8.4, 11.0)      | <b>&lt; 0.001</b> |
| Glycine                        | 31.5 (27.6, 37.8)    | 32.0 (26.9, 36.5)    | 31.5 (27.4, 37.1)    | 0.831             |
| Glycerol                       | 28.1 (25.3, 31.9)    | 28.9 (24.7, 32.4)    | 28.1 (25.2, 31.9)    | 0.729             |
| myo-Inositol                   | 10.1 (8.7, 12.6)     | 10.9 (9.4, 14.1)     | 10.5 (8.9, 13.2)     | 0.005             |
| Betaine                        | 14.8 (13.1, 17.1)    | 14.6 (12.6, 17.4)    | 14.7 (12.9, 17.2)    | 0.520             |
| Serine                         | 11.7 (10.3, 13.3)    | 11.5 (10.2, 13.0)    | 11.5 (10.3, 13.2)    | 0.498             |
| Threonine                      | 2.5 (2.1, 2.7)       | 2.3 (2.1, 2.7)       | 2.4 (2.1, 2.7)       | 0.233             |
| Mannose                        | 4.7 (4.0, 5.7)       | 5.0 (4.1, 6.3)       | 4.9 (4.0, 6.0)       | 0.100             |
| Glucose                        | 190.3 (159.5, 248.0) | 189.9 (151.5, 252.7) | 189.9 (157.5, 248.3) | 0.624             |

|                        |                |                |                |                   |
|------------------------|----------------|----------------|----------------|-------------------|
| Fumaric acid*          | 0.2 (0.1, 0.3) | 0.2 (0.1, 0.2) | 0.2 (0.1, 0.3) | 0.234             |
| 4-Aminohippuric acid** | 0.4 (0.3, 0.5) | 0.4 (0.3, 0.6) | 0.4 (0.3, 0.5) | 0.002             |
| Tyrosine               | 4.0 (3.4, 4.8) | 4.1 (3.3, 4.7) | 4.0 (3.4, 4.8) | 0.935             |
| Histidine***           | 0.4 (0.3, 0.6) | 0.5 (0.3, 0.8) | 0.4 (0.3, 0.7) | 0.028             |
| Phenylalanine          | 5.2 (4.6, 5.8) | 5.3 (4.6, 5.9) | 5.2 (4.6, 5.9) | 0.537             |
| Indoxyl sulfate****    | 0.2 (0.1, 0.3) | 0.3 (0.2, 0.3) | 0.2 (0.1, 0.3) | 0.025             |
| Tryptophan             | 1.9 (1.6, 2.3) | 1.7 (1.4, 2.0) | 1.8 (1.5, 2.2) | <b>&lt; 0.001</b> |
| Salicylic acid*****    | 0.4 (0.2, 0.8) | 0.4 (0.2, 0.9) | 0.4 (0.2, 0.8) | 0.817             |
| Hippuric acid*****     | 0.5 (0.4, 0.8) | 0.6 (0.3, 0.9) | 0.5 (0.3, 0.8) | 0.743             |
| Formic acid            | 1.1 (0.7, 3.1) | 1.5 (0.8, 2.6) | 1.3 (0.8, 3.0) | 0.508             |

Data are presented as median and interquartile range (q1, q3). Differences between AHF patients who were alive and those who deceased within 1 year after hospitalization for AHF were tested using the Mann-Whitney U test.

Due to insufficient quality of the NMR signals \*8 (4 alive, 4 deceased), \*\*23 (20 alive, 3 deceased), \*\*\*37 (27 alive, 10 deceased), \*\*\*\*38 (26 alive, 12 deceased), \*\*\*\*\*18 (15 alive, 3 deceased), and \*\*\*\*\*13 (8 alive, 5 deceased) samples were excluded from the analysis.

P-values of < 0.001 were considered significant after a Bonferroni correction for multiple testing and are depicted in bold.

AU, arbitrary units.
