# Supplementary material for: Low Valine Serum Levels Predict Increased 1-Year Mortality in Acute Heart Failure Patients
Source: MDPI journal article supplement (doi:10.3390/biom13091323), 2023-08-29
Supplement: s1 [file s1]

**Table S4.** Univariable Cox regression analyses of parameters used for adjustment in the multivariable models.

|                                   | HR (95% CI)      | p-value          | Events/N |
|-----------------------------------|------------------|------------------|----------|
| Age (years)                       | 1.04 (1.02-1.06) | <b>&lt;0.001</b> | 118/315  |
| Female sex                        | 0.99 (0.69-1.43) | 0.973            | 118/315  |
| BMI (kg/m <sup>2</sup> )          | 1.03 (1.00-1.06) | <b>0.031</b>     | 118/315  |
| MAP (mmHg)                        | 0.98 (0.97-0.99) | <b>&lt;0.001</b> | 118/315  |
| NT-proBNP (pg/mL)                 | 1.00 (1.00-1.00) | <b>&lt;0.001</b> | 118/315  |
| Haemoglobin (g/L)                 | 0.98 (0.97-0.98) | <b>&lt;0.001</b> | 118/315  |
| BUN (mmol/L)                      | 1.07 (1.05-1.10) | <b>&lt;0.001</b> | 117/314  |
| eGFR (mL/min/1.73m <sup>2</sup> ) | 0.98 (0.97-0.99) | <b>&lt;0.001</b> | 118/315  |
| CRP (mg/L)                        | 1.01 (1.00-1.01) | <b>&lt;0.001</b> | 118/315  |
| ALT (U/L)                         | 1.00 (1.00-1.00) | <b>0.001</b>     | 118/315  |
| Albumin (g/L)                     | 0.96 (0.92-0.99) | <b>0.012</b>     | 113/304  |
| Total cholesterol (mmol/L)        | 0.71 (0.60-0.84) | <b>&lt;0.001</b> | 118/315  |

P-values < 0.05 were considered significant and are depicted in bold.

AHF, acute heart failure; ALT, alanine aminotransferase; BMI, body mass index; BUN, blood urea nitrogen; CI, confidence interval; CRP, C-reactive protein; eGFR, estimated glomerular filtration rate; HR, hazard ratio; MAP, mean arterial pressure; N, number of observations; NT-proBNP, N-terminal pro-brain natriuretic peptide.
