# Supplementary material for: Low Valine Serum Levels Predict Increased 1-Year Mortality in Acute Heart Failure Patients
Source: MDPI journal article supplement (doi:10.3390/biom13091323), 2023-08-29
Supplement: s1 [file s1]

**Table S1.** Chronic medication of AHF patients prior to index AHF hospitalization.

|                            | Alive<br>(N=197) | Deceased<br>(N=118) | All<br>(N=315) | p-value           |
|----------------------------|------------------|---------------------|----------------|-------------------|
| Furosemide                 | 105 (53.3%)      | 88 (74.6%)          | 193 (61.3%)    | <b>&lt; 0.001</b> |
| Chlortalidone              | 17 (8.6%)        | 9 (7.6%)            | 26 (8.3%)      | 0.835             |
| Indapamide                 | 12 (6.1%)        | 11 (9.3%)           | 23 (7.3%)      | 0.371             |
| MRA                        | 36 (18.3%)       | 31 (26.3%)          | 67 (21.3%)     | 0.117             |
| Digoxin                    | 14 (7.1%)        | 14 (11.9%)          | 28 (8.9%)      | 0.158             |
| Nitrate                    | 23 (11.7%)       | 16 (13.6%)          | 39 (12.4%)     | 0.724             |
| Amiodarone                 | 16 (8.1%)        | 9 (7.6%)            | 25 (7.9%)      | 1.000             |
| Beta-blockers              | 119 (60.4%)      | 68 (57.6%)          | 187 (59.4%)    | 0.637             |
| ACEI                       | 101 (51.3%)      | 68 (57.6%)          | 169 (53.7%)    | 0.295             |
| Ang II receptor antagonist | 22 (11.2%)       | 11 (9.3%)           | 33 (10.5%)     | 0.705             |
| Amlodipine                 | 57 (28.9%)       | 34 (28.8%)          | 91 (28.9%)     | 1.000             |
| Statins                    | 76 (38.6%)       | 43 (36.4%)          | 119 (37.8%)    | 0.720             |
| Insulin                    | 28 (14.2%)       | 23 (19.5%)          | 51 (16.2%)     | 0.269             |
| Metformin                  | 27 (13.7%)       | 25 (21.2%)          | 52 (16.5%)     | 0.087             |
| Sulphonylurea              | 23 (11.7%)       | 10 (8.5%)           | 33 (10.5%)     | 0.449             |
| ASA                        | 44 (22.3%)       | 39 (33.1%)          | 83 (26.3%)     | <b>0.047</b>      |
| Warfarine                  | 48 (24.4%)       | 36 (30.5%)          | 84 (26.7%)     | 0.239             |

Data are presented as n (%). Differences between AHF patients who were alive and those who died within 1 year after study enrolment were tested using Fisher's exact test.

P-values of < 0.05 were considered significant and are depicted in bold.

ACEI, angiotensin-converting-enzyme inhibitor; AHF, acute heart failure; Ang II, angiotensin II; ASA, acetylsalicylic acid; MRA, mineralocorticoid receptor antagonist.
