# Supplementary material for: Low Valine Serum Levels Predict Increased 1-Year Mortality in Acute Heart Failure Patients
Source: Biomolecules. 2023 Aug 29;13(9):1323. doi: 10.3390/biom13091323 (PMC10527293; doi:10.3390/biom13091323)
Supplement: Supplementary file 1 [file biomolecules-13-01323-s001.zip › Scheme S1.pdf]

All hospitalized patients with AHF  
N = 646

Excluded  
Acute infection, N = 126  
Acute COPD exacerbation, N = 62  
Severe renal failure (creatinine > 400  $\mu\text{mol/L}$ ), N = 60  
Active malignant disease, N = 69  
Systemic autoimmune disease, N = 3  
Pregnancy, N = 1  
N = 321

Patients eligible for the study  
N = 325

Unwilling to participate  
N = 10

Enrolled patients  
N = 315
